# Supplementary material for: Water Purification and Electrochemical Oxidation: Meeting Different Targets with BDD and MMO Anodes
Source: MDPI journal article supplement (doi:10.3390/environments9110135), 2022-10-27
Supplement: s1 [file s1]

Archive with 2 entries (2 files):
- environments-1845132-supplementary.pdf
- environments-1845132-supplementary.xlsx
