# Supplementary material for: Water Purification and Electrochemical Oxidation: Meeting Different Targets with BDD and MMO Anodes
Source: MDPI journal article supplement (doi:10.3390/environments9110135), 2022-10-27
Supplement: s1 [file s1 › environments-1845132-supplementary.pdf]

## Article

# Water Purification and Electrochemical Oxidation: Meeting Different Targets with BDD and MMO Anodes

Monika R. Snowdon <sup>1,\*</sup>, Shasvat Rathod <sup>1,\*</sup>, Azar Fattahi <sup>1</sup>, Abrar Khan <sup>2</sup>, Leslie M. Bragg <sup>3</sup>, Robert Liang <sup>1</sup>, Norman Zhou <sup>1</sup> and Mark R. Servos <sup>3</sup>

<sup>1</sup> Centre for Advanced Materials Joining, Department of Mechanical and Mechatronics Engineering, University of Waterloo, Waterloo, Ontario N2L3G1, Canada

<sup>2</sup> Faculty of Arts and Science, Harvard University, Cambridge, MA 02138, USA

<sup>3</sup> Department of Biology, University of Waterloo, Waterloo, Ontario N2L3G1, Canada

\* Correspondence: Monika.snowdon@uwaterloo.ca (M.R.S.); Shasvat.rathod@uwaterloo.ca (S.R.)

† Contributed equally to this work.

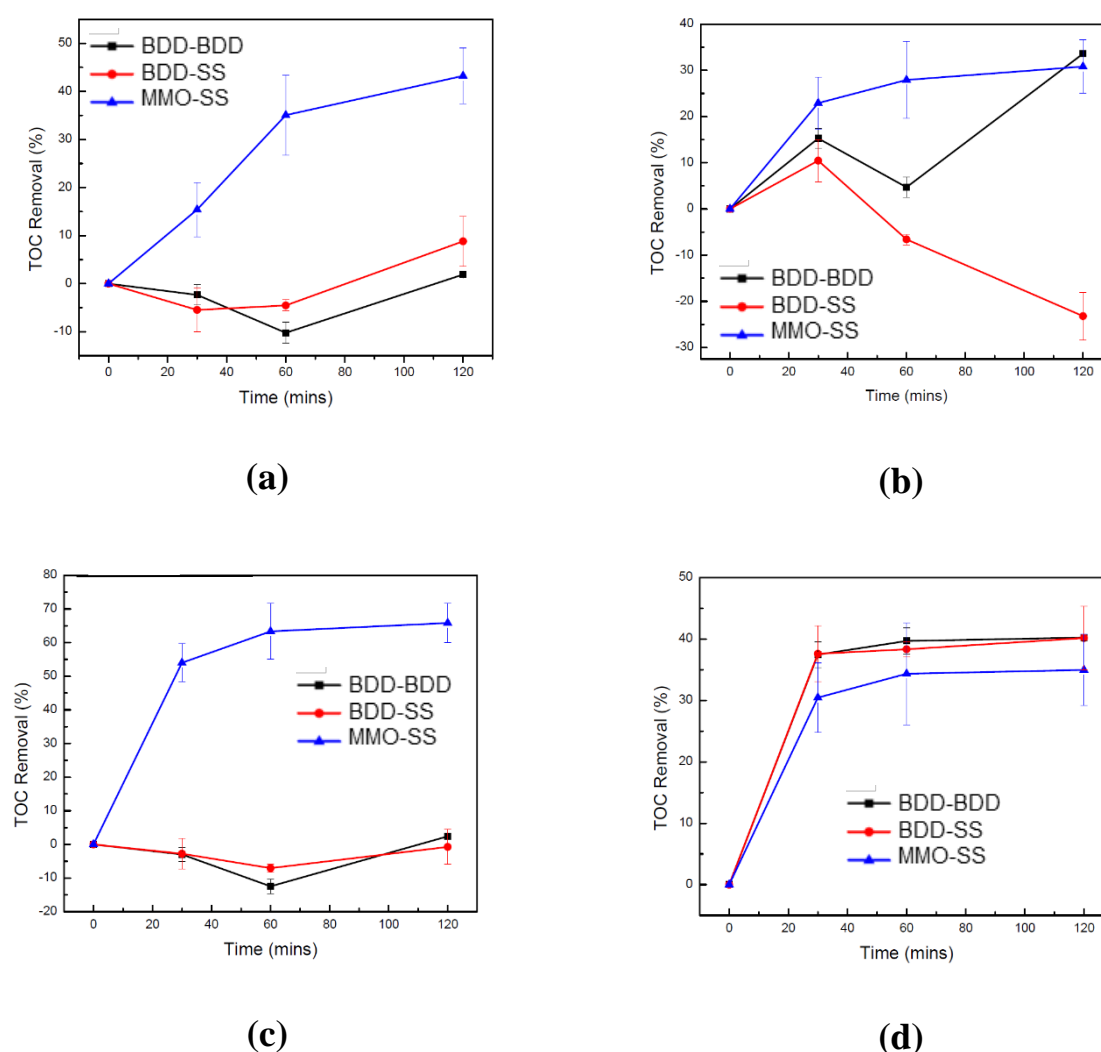

**Figure S1.** TOC Removal using BDD-BDD, BDD-SS, and MMO-SS electrode setups. (a) pH 6.5; current density: 10 mA cm<sup>-2</sup> (b) pH 6.5; current density: 20 mA cm<sup>-2</sup> (c) pH 8.5; current density: 10 mA cm<sup>-2</sup> (d) pH 8.5; current density: 20 mA cm<sup>-2</sup>.

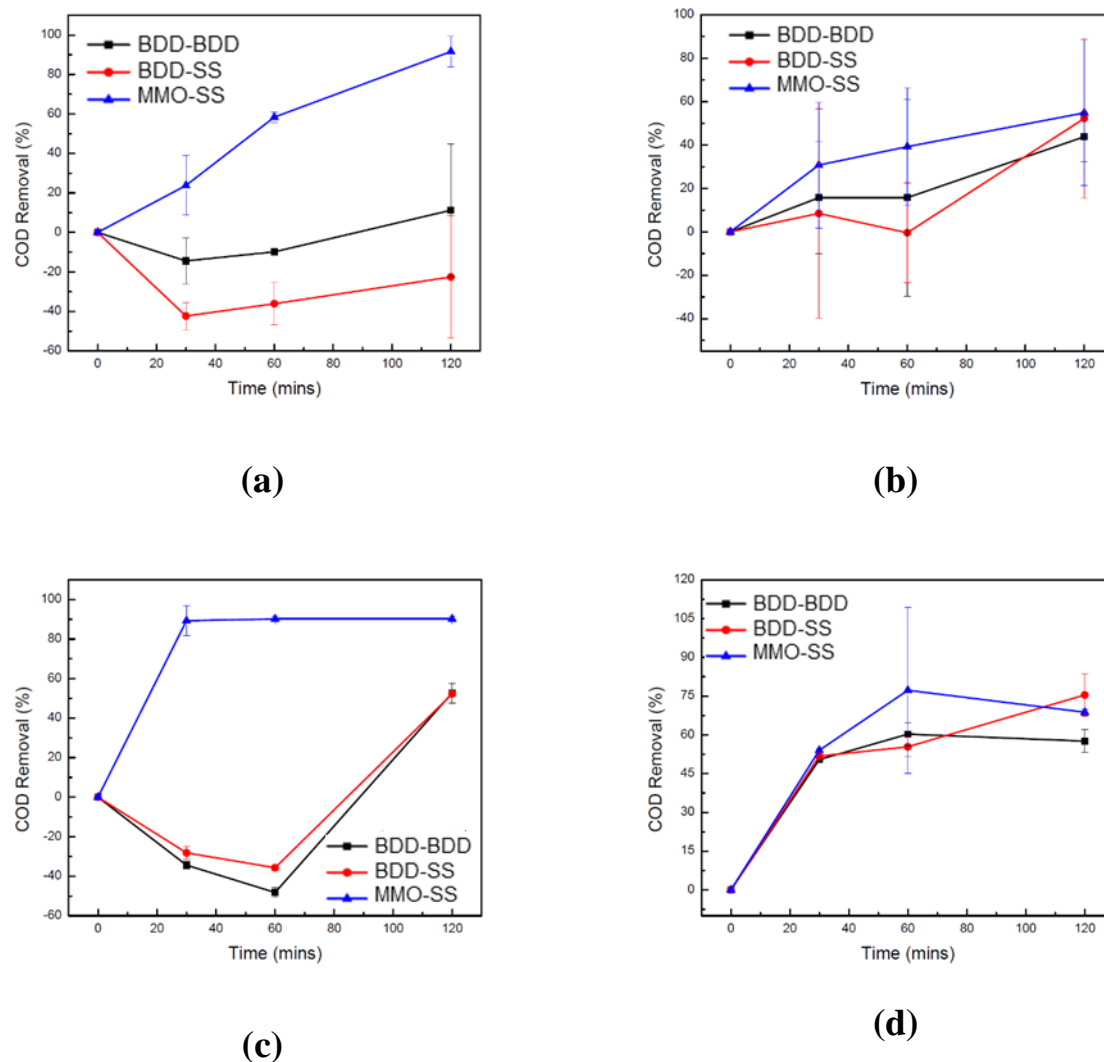

**Figure S2.** COD removal COD using BDD-BDD, BDD-SS, and MMO-SS electrode setups. (a) pH 6.5; current density: 10 mA cm<sup>-2</sup> (b) pH 6.5; current density: 20 mA cm<sup>-2</sup> (c) pH 8.5; current density: 10 mA cm<sup>-2</sup> d) pH 8.5; current density: 20 mA cm<sup>-2</sup>.

**Table S1.** Summary of TOC and COD removal results for each electrode configuration and the two pHs.

| Electrode setup | pH  | $j$ (mA cm <sup>-2</sup> ) | TOC removal (%) | COD removal (%) |
|-----------------|-----|----------------------------|-----------------|-----------------|
| BDD-BDD         | 6.5 | 10                         | 2.4             | -17.7           |
| BDD-SS          |     |                            | -0.7            | 3.8             |
| MMO-SS          |     |                            | 65.8            | 91.6            |
| BDD-BDD         |     | 20                         | ~40             | ~58             |
| BDD-SS          |     |                            | ~40             | ~75             |
| MMO-SS          |     |                            | ~35             | ~69             |
| BDD-BDD         | 8.5 | 10                         | 1.9             | 43.8            |
| BDD-SS          |     |                            | 8.8             | 52.8            |
| MMO-SS          |     |                            | 43.2            | ~55             |
| BDD-BDD         |     | 20                         | ~53             | ~63             |
| BDD-SS          |     |                            | ~1              | ~52             |
| MMO-SS          |     |                            |                 |                 |

---

|        |     |    |     |     |
|--------|-----|----|-----|-----|
| MMO-SS | 8.5 | 20 | ~14 | ~90 |
|--------|-----|----|-----|-----|

---
