# Supplementary material for: Water Purification and Electrochemical Oxidation: Meeting Different Targets with BDD and MMO Anodes
Source: MDPI journal article supplement (doi:10.3390/environments9110135), 2022-10-27
Supplement: s1 [file s1 › environments-1845132-supplementary.xlsx]

## Sheet: PeCOD
2019-09-27					2019-09-27					Average					Actual PeCOD (x2)					2019-09-27 and jan 15 average					Std.Dev
Time	2BDD	BDD-SS	MMO		Time	2BDD	BDD-SS	MMO		Time	2BDD	BDD-SS	MMO		Time	2BDD	BDD-SS	MMO		Time	2BDD	BDD-SS	MMO		Time	2BDD	BDD-SS	MMO
0	7.3	7.3	7.3		0	7.7	7.7	7.7		0	7.5	7.5	7.5		0	15	15	15		0	13.05	13.05	13.05		0	0.282843	0.282843	0.282843
30	9	10.4	6		30	9.5	10.4	7.2		30	9.25	10.4	6.6		30	18.5	20.8	13.2		30	14.775	18.6375	9.75		30	0.353553	0	0.848528
60	8	9.9	3.3		60	8.6	9.4	3.2		60	8.3	9.65	3.25		60	16.6	19.3	6.5		60	14.325	17.8875	5.4		60	0.424264	0.353553	0.0707107
120	4.1	7.4	0.5		120	4.9	7	0.5		120	4.5	7.2	0.5		120	9	14.4	1		120	12.1125	16.4625	1.125		120	0.565685	0.282843	0
2019-10-04					2019-10-04					Average					Actual PeCOD (x2)					2019-10-04 and feb 4 average					Std.Dev
Time	2BDD	BDD-SS	MMO		Time	2BDD	BDD-SS	MMO		Time	2BDD	BDD-SS	MMO		Time	2BDD	BDD-SS	MMO		Time	2BDD	BDD-SS	MMO		Time	2BDD	BDD-SS	MMO
0	5.6	5.6	5.6		0	7.6	7.6	7.6		0	6.6	6.6	6.6		0	13.2	13.2	13.2		0	13.35	13.35	13.35		0	1.41421	1.41421	1.41421
30	6.1	8.7	6.1		30	7.9	7.6	5.3		30	7	8.15	5.7		30	14	16.3	11.4		30	10.4625	10.7625	8.4		30	1.27279	0.777817	0.565685
60	7.7	11.8	5.4		60	8.1	11.4	5.1		60	7.9	11.6	5.25		60	15.8	23.2	10.5		60	9.825	10.425	7.275		60	0.282843	0.282843	0.212132
120	3.1	4.65	0.15		120	3.1	5.75	2.6		120	3.1	5.2	1.375		120	6.2	10.4	2.75		120	7.725	5.25	7.06875		120	0	0.777817	1.73241
2019-10-10					2019-10-10					Average					Actual PeCOD (x2)										Std.Dev
Time	2BDD	BDD-SS	MMO		Time	2BDD	BDD-SS	MMO		Time	2BDD	BDD-SS	MMO		Time	2BDD	BDD-SS	MMO							Time	2BDD	BDD-SS	MMO
0	7.7	7.7	7.7		0	7.7	7.7	7.7		0	7.7	7.7	7.7		0	15.4	15.4	15.4							0	0	0	0
120	7.1	12.1	0.9		120	3.5	3.3	0.7		120	5.3	7.7	0.8		120	10.6	15.4	1.6							30	2.54558	6.22254	0.141421
180	9.8	3.6	7.9		180	10.1	11.7	5.9		180	9.95	7.65	6.9		180	19.9	15.3	13.8							60	0.212132	5.72756	1.41421
240	3.1	8.9	8.1		240	5	9.6	6		240	4.05	9.25	7.05		240	8.1	18.5	14.1							120	1.3435	0.494975	1.48492
2019-10-17					2019-10-17					Average					Actual PeCOD (x2)					2019-10-17 and 12 feb average					Std.Dev
Time	2BDD	BDD-SS	MMO		Time	2BDD	BDD-SS	MMO		Time	2BDD	BDD-SS	MMO		Time	2BDD	BDD-SS	MMO		Time	2BDD	BDD-SS	MMO		Time	2BDD	BDD-SS	MMO
0	9.9	9.9	9.9		0	9.9	9.9	9.9		0	9.9	9.9	9.9		0	19.8	19.8	19.8		0	15.825	15.825	15.825		0	0	0	0
30	10.7	10.5	8.5		30	10.5	10.8	12.5		30	10.6	10.65	10.5		30	21.2	21.3	21		30	19.2375	18.75	8.775		30	0.141421	0.212132	2.82843
60					60					60	#DIV/0!	#DIV/0!	#DIV/0!		60					60	#DIV/0!	#DIV/0!	#DIV/0!		60
120	2.5	3	3.1		120	2.7	2	2.5		120	2.6	2.5	2.8		120	5.2	5	5.6		120	5.925	5.8875	2.925		120	0.141421	0.707107	0.424264
2019-11-07					2019-11-07					Average					Actual PeCOD (x2)					2019-11-07 and 20-feb average					Std.Dev
Time	2BDD	BDD-SS	MMO		Time	2BDD	BDD-SS	MMO		Time	2BDD	BDD-SS	MMO		Time	2BDD	BDD-SS	MMO		Time	2BDD	BDD-SS	MMO		Time	2BDD	BDD-SS	MMO
0	9.9	9.9	9.9		0	9.9	9.9	9.9		0	9.9	9.9	9.9		0	19.8	19.8	19.8		0	15.825	15.825	15.825		0	0	0	0
30	10.9	9.2	9.8		30	15.9	9.8	9.5		30	13.4	9.5	9.65		30	26.8	19	19.3		30	14.2125	11.175	11.1		30	3.53553	0.424264	0.212132
60	20.7	17.3	9.1		60	21.1	17.3	16.6		60	20.9	17.3	12.85		60	41.8	34.6	25.7		60	19.0125	16.725	11.55		60	0.282843	0	5.3033
120	2.5	2.2	2.3		120	2.4	2.5	2.7		120	2.45	2.35	2.5		120	4.9	4.7	5		120	5.4	3.825	4.5		120	0.0707107	0.212132	0.282843
2020-01-15					2020-01-15					Average					Average										Std.Dev
Time	2BDD	BDD-SS	MMO		Time	2BDD	BDD-SS	MMO		Time	2BDD	BDD-SS	MMO		Time	2BDD	BDD-SS	MMO							Time	2BDD	BDD-SS	MMO
0	9.9	9.9	9.9		0	9.9	9.9	9.9		0	9.9	9.9	9.9		0	19.8	19.8	19.8							0	0	0	0
30	11.1	15	5.8		30	9.8	13.9	7		30	10.45	14.45	6.4		30	20.9	28.9	12.8							30	0.919239	0.777817	0.848528
60	10.8	14.6	4		60	10.8	13.8	3.9		60	10.8	14.2	3.95		60	21.6	28.4	7.9							60	0	0.565685	0.0707107
120	11.9	15.1	0.1		120	11.4	14.4	1.9		120	11.65	14.75	1		120	23.3	29.5	2							120	0.353553	0.494975	1.27279
2020-02-04					2020-02-04					Average					Actual PeCOD (x2)										Std.Dev
Time	2BDD	BDD-SS	MMO		Time	2BDD	BDD-SS	MMO		Time	2BDD	BDD-SS	MMO		Time	2BDD	BDD-SS	MMO							Time	2BDD	BDD-SS	MMO
0	11.2	11.2	11.2		0	11.2	11.2	11.2		0	11.2	11.2	11.2		0	22.4	22.4	22.4							0	0	0	0
30	6.5	5	4.6		30	7.4	7.4	6.4		30	6.95	6.2	5.5		30	13.9	12.4	11							30	0.636396	1.69706	1.27279
60	5.3	0.3	4.3		60	5.1	4.3	4.6		60	5.2	2.3	4.45		60	10.4	4.6	8.9							60	0.141421	2.82843	0.212132
120	6.8	2.1	8		120	7.6	1.5	8.1		120	7.2	1.8	8.05		120	14.4	3.6	16.1							120	0.565685	0.424264	0.0707107
2020-02-12					2020-02-12					Average					Actual PeCOD (x2)										Std.Dev
Time	2BDD	BDD-SS	MMO		Time	2BDD	BDD-SS	MMO		Time	2BDD	BDD-SS	MMO		Time	2BDD	BDD-SS	MMO							Time	2BDD	BDD-SS	MMO
0	11.2	11.2	11.2		0	11.2	11.2	11.2		0	11.2	11.2	11.2		0	22.4	22.4	22.4							0	0	0	0
30	14.9	14.1	1.8		30	15.2	14.6	0.6		30	15.05	14.35	1.2		30	30.1	28.7	2.4							30	0.212132	0.353553	0.848528
60	16.4	15.3	1.2		60	16.8	15.1	1		60	16.6	15.2	1.1		60	33.2	30.4	2.2							60	0.282843	0.141421	0.141421
120	4.9	5.3	1		120	5.7	5.4	1.2		120	5.3	5.35	1.1		120	10.6	10.7	2.2							120	0.565685	0.0707107	0.141421
2020-02-20					2020-02-20					Average					Actual PeCOD (x2)										Std.Dev
Time	2BDD	BDD-SS	MMO		Time	2BDD	BDD-SS	MMO		Time	2BDD	BDD-SS	MMO		Time	2BDD	BDD-SS	MMO							Time	2BDD	BDD-SS	MMO
0	11.2	11.2	11.2		0	11.2	11.2	11.2		0	11.2	11.2	11.2		0	22.4	22.4	22.4							0	0	0	0
30	5.6	5.5	5.2		30	5.5	5.3	5.1		30	5.55	5.4	5.15		30	11.1	10.8	10.3							30	0.0707107	0.141421	0.0707107
60	4.8	4.7	5.1		60	4.1	5.3	0		60	4.45	5	2.55		60	8.9	10	5.1							60	0.494975	0.424264	3.60624
120	4.4	2.1	3.4		120	5.1	3.4	3.6		120	4.75	2.75	3.5		120	9.5	5.5	7							120	0.494975	0.919239	0.141421
2020-03-03					2020-03-03					Average					Actual PeCOD (x2)										Std.Dev
Time	2BDD	BDD-SS	MMO		Time	2BDD	BDD-SS	MMO		Time	2BDD	BDD-SS	MMO		Time	2BDD	BDD-SS	MMO							Time	2BDD	BDD-SS	MMO
0	4.9	4.9	4.9		0	4.9	4.9	4.9		0	4.9	4.9	4.9		0	9.8	9.8	9.8							0	0	0	0
30	6	2.8	0.2		30	6.1	3.8	0		240	6.05	3.3	0.1		240	12.1	6.6	0.2							240	0.0707107	0.707107	0.141421
60	3	2.4	0.2		60	2.8	2.1	0.2
120	2.5	2.5	0.1		120	2.5	2	0.1
240	0.1	0.3	0.2		240	0.1	0.3	0.2
2020-03-04					2020-03-04
Time	2BDD	BDD-SS	MMO		Time	2BDD	BDD-SS	MMO
0	8.9	8.9	8.9		0	8.9	8.9	8.9
30	2.1	5.8	2.5		30	3.2	2.8	6.5
60	1.5	4.8	2.7		60	0.8	3.2	5.1
120	1.2	4.2	2.1		120	1.2	2.2	0.3
240	0.3	3.2	1.5		240	0.3	2.8	0.1
2020-03-06					2020-03-06
Time	2BDD	BDD-SS	MMO		Time	2BDD	BDD-SS	MMO
0	9.9	9.9	9.9		0	9.9	9.9	9.9
30	1.5	4.2	2.2		30	1.8	5.2	2.8
60	2.1	2.7	0.3		60	1.2	2.5	1.5
120	0.8	1.5	0.2		120	0.6	0.8	0

## Sheet: TOC
2019-09-27					2019-09-27					Average					Std.dev						Power (kW)		EEO					2019-09-27 and jan 15 average					Std.dev					Average EEO
Time	2BDD	BDD-SS	MMO		Time	2BDD	BDD-SS	MMO		Time	2BDD	BDD-SS	MMO		Time	2bdd	bdd-ss	mmo		2BDD	0.227		Time	2bdd	bdd-ss	mmo		Time	2BDD	BDD-SS	MMO		Time	2BDD	BDD-SS	MMO		Time	2bdd	bdd-ss	mmo
0	6.443	6.443	6.443		0	6.443	6.443	6.443		0	6.443	6.443	6.443		0	0	0	0		BDD-SS	0.069		0	#DIV/0!	#DIV/0!	#DIV/0!		0	#DIV/0!	#DIV/0!	#DIV/0!		0	#DIV/0!	#DIV/0!	#DIV/0!		0	#DIV/0!	#DIV/0!	#DIV/0!
30	6.607	6.886	2.877		30	6.481	6.558	2.899		30	6.544	6.722	2.888		0.5	0.0890955	0.231931	0.0155563		MMO	0.17672		30	-56.0066	-6.24648	0.845168		30	-37.096	-11.6401	0.931492		30	26.7435	7.62777	0.122081		30	0.861362	-0.213353	9.81153
60	6.723	6.768	2.237		60	6.955	6.448	2.055		60	6.839	6.608	2.146		1	0.164049	0.226274	0.128693					60	-29.2099	-20.9435	1.23375		60	-19.1745	-12.3693	1.45217		60	14.1921	12.1258	0.308892		60	8.43663	-8.12672	14.4321
120	6.001	6.938	2.179		120	6.141	6.138	2.565		120	6.071	6.538	2.372		2	0.0989949	0.565685	0.272943					120	58.593	-72.3636	2.71476		120	-131.644	-5183.22	2.68383		120	269.035	7227.84	0.0437442		120	32.659	20.5179	47.3214
2019-10-04					2019-10-04					Average					Std.dev													2019-10-04 and feb 4 average					Std.dev
Time	2BDD	BDD-SS	MMO		Time	2BDD	BDD-SS	MMO		Time	2BDD	BDD-SS	MMO		Time	2bdd	bdd-ss	mmo		2BDD	0.211		Time	2bdd	bdd-ss	mmo		Time	2BDD	BDD-SS	MMO		Time	2BDD	BDD-SS	MMO		Setting	2bdd	bdd-ss	mmo
0	7.027	7.027	7.027		0	7.027	7.027	7.027		0	7.027	7.027	7.027		0	0	0	0		BDD-SS	0.064		0	#DIV/0!	#DIV/0!	#DIV/0!		0	#DIV/0!	#DIV/0!	#DIV/0!		0	#DIV/0!	#DIV/0!	#DIV/0!		6.5 10	-28.1353	-12.0047	1.68916
30	7.219	7.361	6.3		30	7.02	7.854	6.218		30	7.1195	7.6075	6.259		0.5	0.140714	0.348604	0.0579828		MMO	0.15424		30	-61.9182	-3.0943	5.11423		30	-39.9406	-7.18626	4.53158		30	31.0809	5.7869	0.823989		8.5 10	-21.7121	-2.78963	4.97447
60	7.058	8.758	3.934		60	6.987	8.699	3.981		60	7.0225	8.7285	3.9575		1	0.0502046	0.0417193	0.033234					60	-22.5	-2.26541	2.0619		60	-14.4267	0.693909	3.88278		60	11.4174	4.18512	2.5751		6.5 20	15.5748	23.3273	23.4256
120	6.506	8.173	2.468		120	6.475	8.102	3.5		120	6.4905	8.1375	2.984		2	0.0219203	0.0502046	0.729734					120	40.7826	-6.69585	2.76437		120	-10.7691	-1.87654	6.50906		120	72.9052	6.81554	5.29579		8.5 20	57.5851	39.5637	65.3308
2019-10-10					2019-10-10					Average					Std.dev													2019-10-10										Avg	36.58	31.4455	44.3782
Time	2BDD	BDD-SS	MMO		Time	2BDD	BDD-SS	MMO		Time	2BDD	BDD-SS	MMO		Time	2bdd	bdd-ss	mmo		2BDD	0.1885		Time	2bdd	bdd-ss	mmo												Std dev	29.7058	11.4809	29.2587
0	6.584	6.584	6.584		0	6.584	6.584	6.584		0	6.584	6.584	6.584		0	0	0	0		BDD-SS	0.076		0	#DIV/0!	#DIV/0!	#DIV/0!
120	10.57	4.707	2.988		120	8.575	4.357	3.284		120	9.5725	4.532	3.136		0.5	1.41068	0.247487	0.209304		MMO	0.1796		30	-1.93291	0.780929	0.929278												Avg	-24.9237	-7.39718	3.33182
180	6.438	6.118	5.958		180	5.858	6.837	6.282		180	6.148	6.4775	6.12		1	0.410122	0.50841	0.229103					60	21.1162	35.7694	18.8625												Std	4.54184	6.51606	2.32306
240	2.843	6.899	4.094		240	3.193	6.387	3.995		240	3.018	6.643	4.0445		2	0.247487	0.362039	0.0700036					120	3.70949	-130.772	5.65781
2019-10-17					2019-10-17					Average					Std.dev													2019-10-17 and 12 feb average					Std.dev
Time	2BDD	BDD-SS	MMO		Time	2BDD	BDD-SS	MMO		Time	2BDD	BDD-SS	MMO		Time	2bdd	bdd-ss	mmo		2BDD	0.465		Time	2bdd	bdd-ss	mmo		Time	2BDD	BDD-SS	MMO		Time	2BDD	BDD-SS	MMO
0	7.652	7.652	7.652		0	7.652	7.652	7.652		0	7.652	7.652	7.652		0	0	0	0		BDD-SS	0.334		0	#DIV/0!	#DIV/0!	#DIV/0!		0	#DIV/0!	#DIV/0!	#DIV/0!		0	#DIV/0!	#DIV/0!	#DIV/0!
30	6.617	6.77	6.692		30	4.75	6.384	6.881		30	5.6835	6.577	6.7865		0.5	1.32017	0.272943	0.133643		MMO	0.72		30	6.00035	8.46678	23.0198		30	7.47907	5.19728	13.1021		30	2.09123	4.62378	14.0257
60	6.433	7.184	6.525		60	4.433	7.783	6.277		60	5.433	7.4835	6.401		1	1.41421	0.423557	0.175362					60	10.4212	115.13	30.9569		60	17.2425	67.706	18.2314		60	9.64684	67.0681	17.9966
120	3.35	10.34	6.616		120	3.873	10.24	6.453		120	3.6115	10.29	6.5345		2	0.369817	0.0707107	0.115258					120	9.50666	-17.3092	70.009		120	22.0029	-2.92141	38.9434		120	17.6723	20.3474	43.9335
2019-11-07					2019-11-07					Average					Std.dev													2019-11-07 and 20-feb average					Std.dev
Time	2BDD	BDD-SS	MMO		Time	2BDD	BDD-SS	MMO		Time	2BDD	BDD-SS	MMO		Time	2bdd	bdd-ss	mmo		2BDD	0.5884		Time	2bdd	bdd-ss	mmo		Time	2BDD	BDD-SS	MMO		Time	2BDD	BDD-SS	MMO
0	7.625	7.625	7.625		0	7.625	7.625	7.625		0	7.625	7.625	7.625		0	0	0	0		BDD-SS	0.492		0	#DIV/0!	#DIV/0!	#DIV/0!		0	#DIV/0!	#DIV/0!	#DIV/0!		0	#DIV/0!	#DIV/0!	#DIV/0!
30	3.408	3.216	3.092		30	3.572	3.834	5.543		30	3.49	3.525	4.3175		0.5	0.115966	0.436992	1.73312		MMO	0.62		30	2.88929	2.44717	3.31974		30	35.907	12.7757	20.681		30	46.6941	14.6067	24.5525
60	3.392	3.323	3.029		60	3.214	3.054	4.789		60	3.303	3.1885	3.909		1	0.125865	0.190212	1.24451					60	5.3982	4.33114	5.65178		60	50.1052	-88.5375	34.1619		60	63.2252	131.336	40.3194
120	3.526	3.535	3.205		120	3.02	2.827	4.245		120	3.273	3.181	3.725		2	0.357796	0.500632	0.735391					120	10.6799	8.63894	10.5428		120	86.7431	66.3517	141.149		120	107.57	81.6182	184.706
2020-01-15					2020-01-15					Average					Std.dev
Time	2BDD	BDD-SS	MMO		Time	2BDD	BDD-SS	MMO		Time	2BDD	BDD-SS	MMO		Time	2bdd	bdd-ss	mmo		2BDD	0.205		Time	2bdd	bdd-ss	mmo
0	6.209	6.209	6.209		0	6.209	6.209	6.209		0	6.209	6.209	6.209		0	0	0	0		BDD-SS	0.054		0	#DIV/0!	#DIV/0!	#DIV/0!
30	6.406	6.563	2.51		30	6.561	6.007	3.346		30	6.4835	6.285	2.928		0.5	0.109602	0.393151	0.591141		MMO	0.19936		30	-18.1855	-17.0338	1.01782
60	5.816	6.138	1.932		60	8.935	7.713	3.037		60	7.3755	6.9255	2.4845		1	2.20547	1.11369	0.781353					60	-9.13916	-3.79511	1.67059
120	6.033	6.168	1.633		120	6.507	6.251	2.285		120	6.27	6.2095	1.959		2	0.335169	0.0586899	0.461034					120	-321.881	-10294.1	2.6529
2020-02-04					2020-02-04					Average					Std.dev
Time	2BDD	BDD-SS	MMO		Time	2BDD	BDD-SS	MMO		Time	2BDD	BDD-SS	MMO		Time	2bdd	bdd-ss	mmo		2BDD	0.1546		Time	2bdd	bdd-ss	mmo
0	6.209	6.209	6.209		0	6.209	6.209	6.209		0	6.209	6.209	6.209		0	0	0	0		BDD-SS	0.078		0	#DIV/0!	#DIV/0!	#DIV/0!
30	6.274	6.745	6.604		30	6.561	6.007	3.346		30	6.4175	6.376	4.975		0.5	0.20294	0.521845	2.30375		MMO	0.228		30	-17.9631	-11.2782	3.94893
60	6.033	2.828	6.1		60	8.935	7.713	3.037		60	7.484	5.2705	4.5685		1	2.05202	3.45422	2.16587					60	-6.35335	3.65323	5.70365
120	6.393	2.016	6.542		120	6.507	6.251	2.285		120	6.45	4.1335	4.4135		2	0.0806102	2.9946	3.01015					120	-62.3209	2.94278	10.2537
2020-02-12					2020-02-12					Average					Std.dev
Time	2BDD	BDD-SS	MMO		Time	2BDD	BDD-SS	MMO		Time	2BDD	BDD-SS	MMO		Time	2bdd	bdd-ss	mmo		2BDD	0.72		Time	2bdd	bdd-ss	mmo
0	6.209	6.209	6.209		0	6.209	6.209	6.209		0	6.209	6.209	6.209		0	0	0	0		BDD-SS	0.22		0	#DIV/0!	#DIV/0!	#DIV/0!
30	4.561	4.007	3.346		30	4.561	4.007	3.346		30	4.561	4.007	3.346		0.5	0	0	0		MMO	0.513		30	8.95779	1.92777	3.18441
60	4.935	5.713	3.037		60	4.935	5.713	3.037		60	4.935	5.713	3.037		1	0	0	0					60	24.0639	20.2817	5.50588
120	4.507	4.625	2.285		120	4.507	4.625	2.285		120	4.507	4.625	2.285		2	0	0	0					120	34.4991	11.4664	7.87773
2020-02-20					2020-02-20					Average					Std.dev
Time	2BDD	BDD-SS	MMO		Time	2BDD	BDD-SS	MMO		Time	2BDD	BDD-SS	MMO		Time	2bdd	bdd-ss	mmo		2BDD	0.72		Time	2bdd	bdd-ss	mmo
0	7.1	7.1	7.1		0	7.1	7.1	7.1		0	7.1	7.1	7.1		0	0	0	0		BDD-SS	0.324		0	#DIV/0!	#DIV/0!	#DIV/0!
30	6.821	6.728	6.773		30	6.821	6.728	6.773		30	6.821	6.728	6.773		0.5	0	0	0		MMO	0.4674		30	68.9247	23.1042	38.0422
60	6.698	7.198	6.705		60	6.698	7.198	6.705		60	6.698	7.198	6.705		1	0	0	0					60	94.8122	-181.406	62.6721
120	6.634	6.821	6.915		120	6.634	6.821	6.915		120	6.634	6.821	6.915		2	0	0	0					120	162.806	124.064	271.756
2020-03-03					2020-03-03					Average					Std.dev
Time	2BDD	BDD-SS	MMO		Time	2BDD	BDD-SS	MMO		Time	2BDD	BDD-SS	MMO		Time	2bdd	bdd-ss	mmo		2BDD	1.80206		Time	2bdd	bdd-ss	mmo
0	6.917	6.917	6.917		0	6.624	6.624	6.624		0	6.7705	6.7705	6.7705		0	0.207182	0.207182	0.207182		BDD-SS	3.34962		0	#DIV/0!	#DIV/0!	#DIV/0!
30	1.405	1.594	4.594		30	1.191	1.259	5.841		240	1.298	1.4265	5.2175		0.1	0.151321	0.236881	0.881762		MMO	1.92572		30	0.837374	1.65083	5.67264
60	1.298	1.544	3.955		60	1.554	1.849	3.215			1.426	1.6965	3.585		1	0.181019	0.215668	0.523259					60	8.87931	18.576	23.2464
120	0.589	1.325	3.211		120	0.985	1.222	2.519			0.787	1.2735	2.865		2	0.280014	0.072832	0.489318					120	12.8538	30.7747	34.3729
240	0.206	0.911	2.839		240	0.265	0.785	2.898			0.2355	0.848	2.8685		4	0.0417193	0.0890955	0.0417193					240	16.4726	49.5016	68.8435
2020-03-04					2020-03-04
Time	2BDD	BDD-SS	MMO		Time	2BDD	BDD-SS	MMO
0	7.215	7.215	7.215		0	7.215	7.215	7.215
30	1.225	1.899	3.519		30	2.658	2.884	4.843
60	1.125	1.325	4.521		60	1.554	1.119	4.511
120	0.459	1.265	2.589		120	0.216	0.944	2.115
240	0.156	0.844	0.165		240	0.223	0.811	0.255
2020-03-06					2020-03-06
Time	2BDD	BDD-SS	MMO		Time	2BDD	BDD-SS	MMO
0	7.122	7.122	7.122		0	7.122	7.122	7.122
30	1.247	1.524	3.213		30	1.842	2.912	5.48
60	1.535	1.786	2.521		60	1.289	1.24	3.248
120	0.054	0.214	1.267		120	0.649	0.786	1.897

## Sheet: Consumption
2019-09-27									Cell voltage V	Current A	Time h	Sample volume dm3	Esp (KWh/mg COD)	Esp (kWh/k gCOD) *10^4		Esp (KWh/kg COD)		Esp (KWh/mgCOD)					average	stdev	average/10^2(kWh/Kg CoD) remove the division by 0.001	STDEV	2019-09-27					2019-09-27															Average
	pH	6.5		Capacity	Surface	V		2BDD	22.7	0.01	2	0.3	2.40212e+06	240.212	0.00151333	2402.12		472917	540476	-756667	-1.00889e+06		506696	47771.8	5066.96	477.718	Time	2BDD	BDD-SS	MMO		Time	2BDD	BDD-SS	MMO		Time	2BDD	BDD-SS	MMO		Time	2BDD	BDD-SS	MMO		Time	2BDD	BDD-SS
	rpm	400		0	1	300		BDD-SS	6.9	0.01	2	0.3	306667	30.6667	0.00046	730.159		-4.6e+06	657143	-88461.5	-102222		657143	N/A	6571.43	#VALUE!	0	7.3	7.3	7.3		0	7.7	7.7	7.7		0	9.9	9.9	9.9		0	9.9	9.9	9.9		0	8.7	8.7
	Current Density	1000		0.005	1	300		MMO	22.09	0.008	2	0.3	148193	14.8193	0.00117813	1870.05		173255	163630	120218	147267		151092	23210.9	1510.92	232.109	30	9	10.4	6		30	9.5	10.4	7.2		30	11.1	15	5.8		30	9.8	13.9	7		30	9.85	12.425
				0.01	1	300										#DIV/0!									0	0	60	8	9.9	3.3		60	8.6	9.4	3.2		60	10.8	14.6	4		60	10.8	13.8	3.9		60	9.55	11.925
				0.02	1	300										#DIV/0!									0	0	120	4.1	7.4	0.5		120	4.9	7	0.5		120	11.9	15.1	0.1		120	11.4	14.4	1.9		120	8.075	7.2
																#DIV/0!									0	0	high pH low current
2019-10-04									Cell voltage V	Current A	Time h	Sample volume dm3				#VALUE!									0	0	2019-10-04					2019-10-04															Average
	pH	8.5		Capacity	Surface	V		2BDD	21.1	0.01	2	0.3	598582	59.8582	0.00140667	2232.8		562667	-1.27879e+06	319697	390741		424368	124927	4243.68	1249.27	Time	2BDD	BDD-SS	MMO		Time	2BDD	BDD-SS	MMO		Time	2BDD	BDD-SS	MMO		Time	2BDD	BDD-SS	MMO		Time	2BDD	BDD-SS
	rpm	400		0	1	300		BDD-SS	6.4	0.01	2	0.3	73563.2	7.35632	0.000426667	677.249			230631	46886.4	43986.3		107168	106932	1071.68	1069.32	0	5.6	5.6	5.6		0	7.6	7.6	7.6		0	11.2	11.2	11.2		0	11.2	11.2	11.2		0	8.9	8.9
	Current Density	1000		0.005	1	300		MMO	19.28	0.008	2	0.3	244825	24.4825	0.00102827	1632.17		188673	205653	321333	331699		261840	75122.4	2618.4	751.224	30	6.1		6.1		30	7.9	7.6	5.3		30	6.5	5	4.6		30	7.4	7.4	6.4		30	6.975	7.175
				0.01	1	300										#DIV/0!									0	0	60	7.7	11.8	5.4		60	8.1	11.4	5.1		60	5.3	0.3	4.3		60	5.1	4.3	4.6		60	6.55	6.95
				0.02	1	300										#DIV/0!									0	0	120	3.1		0.15		120	8.7	5.75	2.6		120	6.8	2.1	8		120	7.6	1.5	8.1		120	6.55	3.11667
																#DIV/0!									0	0
2019-10-17									Cell voltage V	Current A	Time h	Sample volume dm3				#VALUE!									0	0	2019-10-17					2019-10-17															Average
	pH	6.5		Capacity	Surface	V		2BDD	31	0.015	2	0.3	#REF!	#REF!	#REF!	4920.63		418919	449275	492063	563636		480974	62747.3	4809.74	627.473	Time	2BDD	BDD-SS	MMO		Time	2BDD	BDD-SS	MMO		Time	2BDD	BDD-SS	MMO		Time	2BDD	BDD-SS	MMO		Time	2BDD	BDD-SS
	rpm	400		0	1	300		BDD-SS	16.7	0.02	2	0.3	#REF!	#REF!	#REF!	3534.39		322705	309259	754802	383908		442669	210610	4426.69	2106.1	0	9.9	9.9	9.9		0	9.9	9.9	9.9		0	11.2	11.2	11.2		0	11.2	11.2	11.2		0	10.55	10.55
	Current Density	2000		0.01	1	300		MMO	36	0.02	2	0.3	#REF!	#REF!	#REF!	7619.05		705882	705882	470588	480000		590588	133186	5905.88	1331.86	30	10.7	10.5	8.5		30	10.5	10.8	12.5		30	14.9	14.1	1.8		30	15.2	14.6	0.6		30	12.825	12.5
				0.02	1	300										#DIV/0!									0	0	60					60					60	16.4	15.3	1.2		60	16.8	15.1	1		60
				0.04	1	300										#DIV/0!									0	0	120	2.5	3	3.1		120	2.7	2	2.5		120	4.9	5.3	1		120	5.7	5.4	1.2		120	3.95	3.925
																#DIV/0!									0	0	high pH high current
2019-11-07									Cell voltage V	Current A	Time h	Sample volume dm3				#VALUE!									0	0	2019-11-07					2019-11-07															Average
	pH	8.5		Capacity	Surface	V		2BDD	29.42	0.02	2	0.3	#REF!	#REF!	#REF!	6226.46		530090	523022	576863	643060		568259	56762.7	5682.59	567.627	Time	2BDD	BDD-SS	MMO		Time	2BDD	BDD-SS	MMO		Time	2BDD	BDD-SS	MMO		Time	2BDD	BDD-SS	MMO		Time	2BDD	BDD-SS
	rpm	400		0	1	300		BDD-SS	24.6	0.02	2	0.3	#REF!	#REF!	#REF!	5206.35		425974	443243	720879	420513		502652	145807	5026.52	1458.07	0	9.9	9.9	9.9		0	9.9	9.9	9.9		0	11.2	11.2	11.2		0	11.2	11.2	11.2		0	10.55	10.55
	Current Density	2000		0.01	1	300		MMO	31	0.02	2	0.3	#REF!	#REF!	#REF!	6560.85		543860	543860	529915	543860		540373	6972.56	5403.73	69.7256	30	10.9	9.2	9.8		30	15.9	9.8	9.5		30	5.6	5.5	5.2		30	5.5	5.3	5.1		30	9.475	7.45
				0.02	1	300										#DIV/0!											60	20.7	17.3	9.1		60	21.1	17.3	16.6		60	4.8	4.7	5.1		60	4.1	5.3	0		60	12.675	11.15
																#DIV/0!											120	2.5	2.2	2.3		120	2.4	2.5	2.7		120	4.4	2.1	3.4		120	5.1	3.4	3.6		120	3.6	2.55
																#DIV/0!
																#DIV/0!
													564412	56.4412	0.00392267	#DIV/0!
													410000	41	0.00328	#DIV/0!
													547461	54.7461	0.00413333	#DIV/0!
				0.04	1	300
2020-01-15									Cell voltage V	Current A	Time h	Sample volume dm3
	pH	6.5		Capacity	Surface	V		2BDD	20.5	0.01	2	0.3			0.00136667
	rpm	400		0	1	300		BDD-SS	5.4	0.01	2	0.3			0.00036
	Current Density	1000		0.01	1	300		MMO	24.92	0.008	2	0.3			0.00132907
				0.02	1	300
				0.04	1	300
2020-02-04									Cell voltage V	Current A	Time h	Sample volume dm3
	pH	8.5		Capacity	Surface	V		2BDD	15.46	0.01	2	0.3			0.00103067
	rpm	400		0	1	300		BDD-SS	7.8	0.01	2	0.3			0.00052
	Current Density	1000		0.01	1	300		MMO	28.5	0.008	2	0.3			0.00152
				0.02	1	300
				0.04	1	300
2020-02-12									Cell voltage V	Current A	Time h	Sample volume dm3
	pH	6.5		Capacity	Surface	V		2BDD	36	0.02	2	0.3			0.0048
	rpm	400		0	1	300		BDD-SS	11	0.02	2	0.3			0.00146667
	Current Density	2000		0.01	1	300		MMO	27	0.019	2	0.3			0.00342
				0.02	1	300
				0.04	1	300
2020-02-20									Cell voltage V	Current A	Time h	Sample volume dm3
	pH	8.5		Capacity	Surface	V		2BDD	36	0.02	2	0.3			0.0048
	rpm	400		0	1	300		BDD-SS	16.2	0.02	2	0.3			0.00216
	Current Density	2000		0.01	1	300		MMO	24.6	0.019	2	0.3			0.003116
				0.02	1	300
				0.04	1	300
2020-03-03									Cell voltage V	Current A	Time h	Sample volume dm3
	pH	6.5		Capacity	Surface	V		2BDD	62.14	0.029	2	0.3			0.0120137
	rpm	400		0	1	300		BDD-SS	62.03	0.054	2	0.3			0.0223308
	Current Density	3600		0.01	1	300		MMO	62.12	0.031	1	0.3			0.00641907
				0.02	1	300
				0.04	1	300
[truncated: 1 more columns]

## Sheet: PeCOD TOC Ratio
PeCOD/TOC					2019-09-27 and jan 15 average					Std.dev					2019-09-27 and jan 15 average
Time	2BDD	BDD-SS	MMO		Time	2BDD	BDD-SS	MMO		Time	2BDD	BDD-SS	MMO		Time	2BDD	BDD-SS	MMO
0	2.32811	2.32811	2.32811		0	2.75851	2.75851	2.75851		0	0.608685	0.608685	0.608685		0	0	0	0
30	2.82702	3.09432	4.57064		30	3.02529	3.84628	4.47111		30	0.280403	1.06344	0.140751		30	-9.6711	-39.4332	-62.0841
60	2.42726	2.9207	3.02889		60	2.67794	3.51074	3.1043		60	0.354515	0.834446	0.106648		60	2.92108	-27.2694	-12.5353
120	1.48246	2.20251	0.421585		120	2.59928	3.47665	0.721257		120	1.57943	1.8019	0.4238		120	5.77233	-26.0333	73.8534
PeCOD/TOC					2019-10-04 and feb 4 average					Std.dev					2019-10-04 and feb 4 average
Time	2BDD	BDD-SS	MMO		Time	2BDD	BDD-SS	MMO		Time	2BDD	BDD-SS	MMO		Time	2BDD	BDD-SS	MMO
0	1.87847	1.87847	1.87847		0	2.74307	2.74307	2.74307		0	1.22273	1.22273	1.22273		0	0	0	0
30	1.96643	2.14262	1.82138		30	2.06619	2.04371	2.01622		30	0.141084	0.139887	0.275544		30	24.6759	25.4955	26.4978
60	2.24991	2.65796	2.65319		60	1.81977	1.76537	2.30066		60	0.60831	1.26231	0.498558		60	33.6593	35.6425	16.1283
120	0.955242	1.27803	0.921582		120	1.5939	1.07448	2.28474		120	0.903199	0.287864	1.9278		120	41.8935	60.8291	16.7086
PeCOD/TOC					2019-10-10										2019-10-10
Time	2BDD	BDD-SS	MMO
0	2.339	2.339	2.339
120	1.10734	3.39806	0.510204
180	3.23682	2.36202	2.2549
240	2.6839	2.78489	3.48622
PeCOD/TOC					2019-10-17 and 12 feb average					Std.dev					2019-10-17 and 12 feb average
Time	2BDD	BDD-SS	MMO		Time	2BDD	BDD-SS	MMO		Time	2BDD	BDD-SS	MMO		Time	2BDD	BDD-SS	MMO
0	2.58756	2.58756	2.58756		0	3.09761	3.09761	3.09761		0	0.721325	0.721325	0.721325		0	0	0	0
30	3.7301	3.23856	3.09438		30	5.16476	5.20051	1.90583		30	2.02893	2.77462	1.68087		30	-66.7337	-67.8878	38.4743
60					60	6.72746	5.3212	0.724399		60	#DIV/0!	#DIV/0!	#DIV/0!		60	-117.182	-71.7838	76.6143
120	1.43984	0.485909	0.85699		120	1.89587	1.39971	0.909895		120	0.644918	1.29231	0.0748197		120	38.7957	54.8132	70.6259
PeCOD/TOC					2019-11-07 and 20-feb average					Std.dev					2019-11-07 and 20-feb average
Time	2BDD	BDD-SS	MMO		Time	2BDD	BDD-SS	MMO		Time	2BDD	BDD-SS	MMO		Time	2BDD	BDD-SS	MMO
0	2.59672	2.59672	2.59672		0	2.87583	2.87583	2.87583		0	0.394713	0.394713	0.394713		0	0	0	0
30	7.67908	5.39007	4.47018		30	4.65321	3.49765	2.99546		30	4.27924	2.67629	2.08557		30	-61.8042	-21.6225	-4.16007
60	12.6552	10.8515	6.57457		60	6.99196	6.12039	3.6676		60	8.00898	6.6908	4.11108		60	-143.129	-112.822	-27.532
120	1.4971	1.47752	1.34228		120	1.46456	1.14193	1.17729		120	0.0460189	0.474603	0.233338		120	49.0735	60.2922	59.0626
PeCOD/TOC					2020-01-15
Time	2BDD	BDD-SS	MMO
0	3.18892	3.18892	3.18892
30	3.22357	4.59825	4.37158
60	2.92862	4.10079	3.17971
120	3.71611	4.75079	1.02093
PeCOD/TOC					2020-02-04
Time	2BDD	BDD-SS	MMO
0	3.60767	3.60767	3.60767
30	2.16595	1.94479	2.21106
60	1.38963	0.872782	1.94812
120	2.23256	0.870933	3.6479
PeCOD/TOC					2020-02-12
Time	2BDD	BDD-SS	MMO
0	3.60767	3.60767	3.60767
30	6.59943	7.16247	0.717274
60	6.72746	5.3212	0.724399
120	2.3519	2.31351	0.962801
PeCOD/TOC					2020-02-20
Time	2BDD	BDD-SS	MMO
0	3.15493	3.15493	3.15493
30	1.62733	1.60523	1.52074
60	1.32875	1.38927	0.760626
120	1.43202	0.806333	1.01229
																Ti
PeCOD/TOC					PeCOD/TOC					Std.dev
Time	2BDD	BDD-SS	MMO		Time	2BDD	BDD-SS	MMO		Time	2BDD	BDD-SS	MMO
0	1.4168	1.4168	1.4168		0	1.47947	1.47947	1.47947		0	0.044314	0.044314	0.044314
30	8.54093	3.51317	0.0870701		30	10.2435	6.03654	0		240	1.2039	1.78429	0.0615679

## Sheet: Sheet1
AOPs: Advanced oxidation processes
BDD: Boron-doped diamond
CVD: Chemical Vapour Deposition
DBP: Disinfection by-products
DET: Direct electron transfer
DOC: Dissolved organic carbon
DSA: Dimensionally stable anodes
EAOPs: Electrochemical advanced oxidation processes
EC: Electrochemical processes
EO: Electrooxidation
MMO: Mixed-metal oxides
OH: Hydroxyl radicals
SUVA: Specific Ultraviolet Absorbance
TOC: Total organic carbon

## Sheet: OD
2019-09-27					2019-09-27
Time	2BDD	BDD-SS	MMO		Time	2BDD	BDD-SS	MMO
0	0.179	0.179	0.179		0	0.179	0.179	0.179
30	0.187	0.167	0.219		30	0.167	0.236	0.219
60	0.15	0.15	0.178		60	0.166	0.166	0.179
120	0.22	0.175	0.219		120	0.22	0.18	0.222
2019-10-04					2019-10-04
Time	2BDD	BDD-SS	MMO		Time	2BDD	BDD-SS	MMO
0	0.164	0.164	0.164		0	0.164	0.164	0.164
30	0.181	0.166	0.188		30	0.191	0.311	0.206
60	0.188	0.183	0.124		60	0.193	0.18	0.129
120	0.3	0.168	0.072		120	0.22	0.236	0.176
2019-10-10					2019-10-10
Time	2BDD	BDD-SS	MMO		Time	2BDD	BDD-SS	MMO
0	0.163	0.163	0.163		0	0.163	0.163	0.163
120	0.269	0.238	0.084		120	0.269	0.238	0.084
180	0.192	0.17	0.187		180	0.192	0.17	0.187
240	0.11	0.182	0.486		240	0.11	0.182	0.486
2019-10-17					2019-10-17
Time	2BDD	BDD-SS	MMO		Time	2BDD	BDD-SS	MMO
0	0.174	0.174	0.174		0	0.174	0.174	0.174
30	0.177	0.191	0.172		30	0.161	0.196	0.176
60	0.206	0.218	0.236		60	0.216	0.191	0.203
120	0.203	0.3	0.3		120	0.203	0.3	0.3
2019-11-07					2019-11-07
Time	2BDD	BDD-SS	MMO		Time	2BDD	BDD-SS	MMO
0	0.17	0.17	0.17		0	0.17	0.17	0.17
30	0.179	0.203	0.193		30	0.106	0.316	0.179
60	0.215	0.22	0.252		60	0.216	0.199	0.271
120	0.234	0.277	0.348		120	0.216	0.337	0.291
2020-01-15					2020-01-15
Time	2BDD	BDD-SS	MMO		Time	2BDD	BDD-SS	MMO
0	0.184	0.184	0.184		0	0.184	0.184	0.184
30	0.178	0.168	0.128		30	0.176	0.174	0.14
60	0.176	0.171	0.267		60	0.177	0.171	0.225
120	0.203	0.171	0.372		120	0.203	0.171	0.366
2020-02-04					2020-02-04
Time	2BDD	BDD-SS	MMO		Time	2BDD	BDD-SS	MMO
0	0.165	0.165	0.165		0	0.165	0.165	0.165
30	0.172	0.175	0.196		30	0.173	0.175	0.192
60	0.189	0.186	0.178		60	0.183	0.187	0.18
120	0.232	0.146	0.183		120	0.232	0.149	0.186
2020-02-12					2020-02-12
Time	2BDD	BDD-SS	MMO		Time	2BDD	BDD-SS	MMO
0	0.15	0.15	0.15		0	0.15	0.15	0.15
30	0.154	0.139	0.198		30	0.153	0.138	0.17
60	0.155	0.15	0.038		60	0.162	0.15	0.075
120	0.158	0.177	0.2		120	0.157	0.174	0.199
2020-02-20					2020-02-20
Time	2BDD	BDD-SS	MMO		Time	2BDD	BDD-SS	MMO
0	0.174	0.174	0.174		0	0.174	0.174	0.174
30	0.185	0.203	0.167		30	0.183	0.2	0.167
60	0.192	0.191	0.174		60	0.193	0.19	0.17
120	0.207	0.177	0.157		120	0.206	0.184	0.16
2020-03-03					2020-03-03
Time	2BDD	BDD-SS	MMO		Time	2BDD	BDD-SS	MMO		Time	2BDD	BDD-SS	MMO		Time	2BDD	BDD-SS	MMO
0	0.17	0.17	0.17		0	0.17	0.17	0.17		0	0.17	0.17	0.17		0	0.17	0.17	0.17
30	0.184	0.181	0.167		240	0.149	0.12	0.144		240	0.235	1.709	0.055		240	0.237	1.419	0.075
60	0.184	0.196	0.176
120	0.179	0.168	0.184
240	0.151	0.12	0.123
2020-03-04
Time	2BDD	BDD-SS	MMO
0	0.172	0.172	0.172
30	0.174	0.181	0.101
60	0.171	0.176	0.098
120	0.181	0.175	0.099
240	0.171	0.173	0.103
2020-03-06
Time	2BDD	BDD-SS	MMO
0	0.235	0.219	0.209
30	0.237	0.279	0.226
60	0.22	0.191	0.205
120	0.223	0.208	0.211

## Sheet: SUVA
2019-09-27					2019-09-27					2019-09-27 and jan 15 average					Std.Dev
Time	2BDD	BDD-SS	MMO		Time	2BDD	BDD-SS	MMO		Time	2BDD	BDD-SS	MMO		Time	2BDD	BDD-SS	MMO
0	2.77821	2.77821	2.77821		0	2.77821	2.77821	2.77821		0	2.87082	2.87082	2.87082		0	0.106943	0.106943	0.106943
30	2.83033	2.42521	7.6121		30	2.57676	3.59866	7.55433		30	2.71706	2.87007	6.11253		30	0.111803	0.52463	1.739
60	2.23115	2.21631	7.95709		60	2.38677	2.57444	8.71046		60	2.40626	2.44843	9.47401		60	0.445779	0.28119	2.94598
120	3.66606	2.52234	10.0505		120	3.58248	2.93255	8.65497		120	3.43327	2.74071	14.3758		120	0.244576	0.168837	6.44889
2019-10-04					2019-10-04					2019-10-04 and feb 4 average					Std.Dev
Time	2BDD	BDD-SS	MMO		Time	2BDD	BDD-SS	MMO		Time	2BDD	BDD-SS	MMO		Time	2BDD	BDD-SS	MMO
0	2.33386	2.33386	2.33386		0	2.33386	2.33386	2.33386		0	2.49564	2.49564	2.49564		0	0.186818	0.186818	0.186818
30	2.50727	2.25513	2.98413		30	2.7208	3.95977	3.31296		30	2.65158	2.93067	3.7508		30	0.106325	0.736817	1.33444
60	2.66364	2.08952	3.15201		60	2.76227	2.0692	3.24039		60	2.6517	3.29007	3.80933		60	0.450222	2.19739	1.41825
120	4.61113	2.05555	2.91734		120	3.39768	2.91286	5.02857		120	3.80079	3.64852	4.72082		120	0.548962	2.42159	2.49922
2019-10-10					2019-10-10
Time	2BDD	BDD-SS	MMO		Time	2BDD	BDD-SS	MMO
0	2.4757	2.4757	2.4757		0	2.4757	2.4757	2.4757
120	2.54494	5.0563	2.81124		120	3.13703	5.46247	2.55786
180	2.98229	2.77869	3.13864		180	3.27757	2.48647	2.97676
240	3.86915	2.63806	11.871		240	3.44504	2.84954	12.1652
2019-10-17					2019-10-17					2019-10-17 and 12 feb average					Std.Dev
Time	2BDD	BDD-SS	MMO		Time	2BDD	BDD-SS	MMO		Time	2BDD	BDD-SS	MMO		Time	2BDD	BDD-SS	MMO
0	2.27392	2.27392	2.27392		0	2.27392	2.27392	2.27392		0	2.34488	2.34488	2.34488		0	0.0819449	0.0819449	0.0819449
30	2.67493	2.82127	2.57023		30	3.38947	3.07018	2.55777		30	3.19885	3.20109	4.03155		30	0.349576	0.312053	1.72868
60	3.20224	3.03452	3.61686		60	4.87255	2.45407	3.23403		60	3.62457	2.68494	2.64292		60	0.834008	0.246681	1.0432
120	6.0597	2.90135	4.53446		120	5.24141	2.92969	4.649		120	4.57256	3.35506	6.66129		120	1.28884	0.508356	2.39025
2019-11-07					2019-11-07					2019-11-07 and 20-feb average					Std.Dev
Time	2BDD	BDD-SS	MMO		Time	2BDD	BDD-SS	MMO		Time	2BDD	BDD-SS	MMO		Time	2BDD	BDD-SS	MMO
0	2.22951	2.22951	2.22951		0	2.22951	2.22951	2.22951		0	2.34011	2.34011	2.34011		0	0.127708	0.127708	0.127708
30	5.25235	6.31219	6.24191		30	2.96753	8.24204	3.2293		30	3.40374	5.13603	3.60064		30	1.23901	2.59488	1.79727
60	6.33844	6.62052	8.31958		60	6.7206	6.51604	5.6588		60	4.70176	4.60743	4.77722		60	2.11629	2.26461	2.77566
120	6.63642	7.83593	10.858		120	7.15232	11.9208	6.85512		120	5.00356	6.26229	5.57435		120	2.19346	4.49635	4.12734
2020-01-15					2020-01-15
Time	2BDD	BDD-SS	MMO		Time	2BDD	BDD-SS	MMO
0	2.96344	2.96344	2.96344		0	2.96344	2.96344	2.96344
30	2.77865	2.5598	5.0996		30	2.68252	2.89662	4.1841
60	3.02613	2.78592	13.8199		60	1.98097	2.21704	7.40863
120	3.36483	2.77237	22.7802		120	3.11972	2.73556	16.0175
2020-02-04					2020-02-04
Time	2BDD	BDD-SS	MMO		Time	2BDD	BDD-SS	MMO
0	2.65743	2.65743	2.65743		0	2.65743	2.65743	2.65743
30	2.74147	2.59451	2.9679		30	2.63679	2.91327	5.73819
60	3.13277	6.57709	2.91803		60	2.04813	2.42448	5.9269
120	3.62897	7.24206	2.79731		120	3.56539	2.38362	8.14004
2020-02-12					2020-02-12
Time	2BDD	BDD-SS	MMO		Time	2BDD	BDD-SS	MMO
0	2.41585	2.41585	2.41585		0	2.41585	2.41585	2.41585
30	3.37645	3.46893	5.91751		30	3.35453	3.44397	5.08069
60	3.14083	2.62559	1.25123		60	3.28267	2.62559	2.46954
120	3.50566	3.82703	8.75274		120	3.48347	3.76216	8.70897
2020-02-20					2020-02-20
Time	2BDD	BDD-SS	MMO		Time	2BDD	BDD-SS	MMO
0	2.4507	2.4507	2.4507		0	2.4507	2.4507	2.4507
30	2.71221	3.01724	2.46567		30	2.68289	2.97265	2.46567
60	2.86653	2.65351	2.59508		60	2.88146	2.63962	2.53542
120	3.12029	2.59493	2.27043		120	3.10522	2.69755	2.31381
2020-03-03					2020-03-03					AVG					Std.Dev
Time	2BDD	BDD-SS	MMO		Time	2BDD	BDD-SS	MMO		Time	2BDD	BDD-SS	MMO		Time	2BDD	BDD-SS	MMO
0	2.45771	2.45771	2.45771		0	2.56643	2.56643	2.56643		0	2.51207	2.51207	2.51207		0	0.0384356	0.0384356	0.0384356
240	13.0961	11.3551	3.63518		240	12.5105	9.53137	2.46533		240	12.8033	10.4432	3.05025		240	0.207037	0.644778	0.413603
	14.1757	12.6943	4.45006
	30.3905	12.6792	5.7303
	73.301	13.1723	4.33251
2020-03-04
Time	2BDD	BDD-SS	MMO
0	2.38392	2.38392	2.38392
240	14.2041	9.53133	2.87013
	15.2	13.283	2.16766
	39.4336	13.834	3.82387
	109.615	20.4976	62.4242
2020-03-06
Time	2BDD	BDD-SS	MMO
0	3.29963	3.07498	2.93457
240	19.0056	18.3071	7.03392
	14.3322	10.6943	8.13169
	412.963	97.1963	16.6535

## Sheet: ThOD and peCOD
ThOD		SUVA		peCOD	SUVA
Glucuronamide	Suwannee River NOM	Glucuronamide	Suwannee River NOM	NOM Initial	Initial
8	6.22	0.021	3.84	15	2.7782
	10.18		4.03	13.2	2.3339
	23.24		3.46	15.4	2.4757
8	13.2133	0.021	3.77667	19.8	2.2739
				19.8	2.2295
NOM solution ThOD	21.2133			19.8	2.9634
SUVA theorectical	3.79767			22.4	2.6574
				22.4	2.4158
				22.4	2.4507
				9.8	2.5564
				18	2.51349
15.1477
33.8149

## Sheet: Consumption vs. Removal
Avg Removal %					Std. dev					Voltage				Energy Consumption				Std. dev
Time	2BDD	BDD-SS	MMO		Time	2BDD	BDD-SS	MMO		Time	2BDD	BDD-SS	MMO	Time	2BDD	BDD-SS	MMO	Time	2BDD	BDD-SS	MMO
0	0	0	0		0	0	0	0		0	0	0	0	0	0	0	0	0	0	0	0
30	-2.9943	-2.77716	54.0094		30	2.09524	4.57167	5.6612		30	26.2	9.2	21.33	30	0.000436667	0.000153333	0.0003555	30	0.00120208	0.00062	9.2e-05
60	-12.4667	-7.05031	63.339		60	21.8173	11.757	8.31336		60	24.4	6.7	17.54	60	0.000813333	0.000223333	0.000584667	60	0.000537401	0.0003303	0.0006198
120	2.39563	-0.741261	65.8169		120	5.07103	5.16816	5.79632		120	23.3	6.3	25.67	120	0.00155333	0.00042	0.00171133	120	0.000975807	0.000959	1.581e-05
Avg Removal %					Std. dev					Voltage				Energy Consumption				Std. dev
Time	2BDD	BDD-SS	MMO		Time	2BDD	BDD-SS	MMO		Time	2BDD	BDD-SS	MMO	Time	2BDD	BDD-SS	MMO	Time	2BDD	BDD-SS	MMO
0	0	0	0		0	0	0	0		0	0	0	0	0	0	0	0	0	0	0	0
30	-2.33719	-5.47532	15.4018		30	2.50741	6.48816	22.0406		30	24.6	7.1	31	30	0.00041	0.000118333	0.000516667	30	0.00061	0.000624	0.0001591
60	-10.2353	-4.5493	35.0514		60	22.4875	39.3365	22.4718		60	24.5	10.6	20.5	60	0.000816667	0.000353333	0.000683333	60	6.2e-05	8.4e-05	0.00021894
120	1.87669	8.81198	43.2265		120	6.69348	39.7923	33.0513		120	21.2	6.4	19.24	120	0.00141333	0.000426667	0.00128267	120	0.0006918	4.84e-05	0.0001984
Avg Removal %					Std. dev					Voltage				Energy Consumption				Std. dev
Time	2BDD	BDD-SS	MMO		Time	2BDD	BDD-SS	MMO		Time	2BDD	BDD-SS	MMO	Time	2BDD	BDD-SS	MMO	Time	2BDD	BDD-SS	MMO
0	0	0	0		0	0	0	0		0	0	0	0	0	0	0	0	0	0	0	0
30	15.2605	10.4502	22.9107		30	21.8487	6.72366	20.1295		30	36	8	30.19	30	0.0012	0.000266667	0.00100633	30	0.000949	0.000594	0.000497
60	4.69797	-6.60627	27.9282		60	44.0727	15.7505	20.1216		60	36	8.7	31	60	0.0024	0.00058	0.00206667	60	4.984e-05	4.94e-05	0.000489
120	33.6023	-23.2086	30.8022		120	33.432	19.5243	28.0763		120	36	11	27	120	0.0048	0.00146667	0.0036	120	9.4e-05	0.000198	0.0007984
Avg Removal %					Std. dev					Voltage				Energy Consumption				Std. dev
Time	2BDD	BDD-SS	MMO		Time	2BDD	BDD-SS	MMO		Time	2BDD	BDD-SS	MMO	Time	2BDD	BDD-SS	MMO	Time	2BDD	BDD-SS	MMO
0	0	0	0		0	0	0	0		0	0	0	0	0	0	0	0	0	0	0	0
30	37.4629	37.5935	30.4532		30	29.0606	28.311	27.557		30	30	29.8	29.8	30	0.001	0.000993333	0.000993333	30	0.00049	0.0001544	0.0008494
60	39.6753	38.329	34.3441		60	29.4795	34.4344	27.4671		60	31	20.7	31	60	0.00206667	0.00138	0.00206667	60	0.000478	0.00022	0.0001984
120	40.2381	40.1645	34.9669		120	29.3513	31.7219	28.8435		120	29.92	24.6	31	120	0.00398933	0.00328	0.00413333	120	4.9e-05	1.9e-05	0.000156
Avg Removal %					Std. dev					Voltage				Energy Consumption				Std. dev
Time	2BDD	BDD-SS	MMO		Time	2BDD	BDD-SS	MMO		Time	2BDD	BDD-SS	MMO	Time	2BDD	BDD-SS	MMO	Time	2BDD	BDD-SS	MMO
0	0	0	0		0	0	0	0		0	0	0	0	0	0	0	0	0	0	0	0
30	81.2346	79.3769	24.5699		240	2.18767	3.42462	12.7478		30	62.7	62.07	62.06	30	0.0036575	0.00362075	0.00362017	30	0.00049	0.0001544	0.0008494
	79.3841	75.4735	48.1712			2.61702	3.11794	7.56483		60	62.14	62.03	62.12	60	0.00724967	0.00723683	0.00724733	60	0.000478	0.00022	0.0001984
	88.6222	81.5888	58.5803			4.0482	1.05294	7.07413		120	62.03	62.03	62.01	120	0.0144737	0.0144737	0.014469	120	4.9e-05	1.9e-05	0.000156
	96.5953	87.7403	58.5297			0.603142	1.28806	0.603142		240	62.4	62.03	62.02		0.02912	0.0289473	0.0289427		4.49e-05	5e-05	2.42e-05
-12.4667	0.000813333	0.000537401		0	0	0		0	0	0			-14.4439	0.00041	0.00061		-48.2143	0.0024	4.984e-05		-23.4694	0.0036575	0.00049
-10.2353	0.000816667	6.2e-05		0	0	0		79.3841	0.00724967	0.000478			-9.86479	0.000816667	6.2e-05		-34.375	0.0012	0.000949		0	0	0
-2.9943	0.000436667	0.00120208		4.69797	0.0024	4.984e-05		81.2346	0.0036575	0.00049			0	0	0		0	0	0		40.8163	0.00724967	0.000478
-2.33719	0.00041	0.00061		15.2605	0.0012	0.000949		88.6222	0.0144737	4.9e-05			0	0	0		0	0	0		48.9796	0.0144737	4.9e-05
0	0	0		33.6023	0.0048	9.4e-05		96.5953	0.02912	4.49e-05			11.2114	0.00141333	0.0006918		50.4464	0.001	0.00049		97.9592	0.02912	4.49e-05
0	0	0		37.4629	0.001	0.00049							15.7542	0.0012	0.000949		52.6786	0.0048	9.4e-05
1.87669	0.00141333	0.0006918		39.6753	0.00206667	0.000478							15.766	0.0024	4.984e-05		57.5893	0.00398933	4.9e-05
2.39563	0.00155333	0.000975807		40.2381	0.00398933	4.9e-05							43.8205	0.0048	9.4e-05		60.2679	0.00206667	0.000478
-7.05031	0.000223333	0.0003303		-23.2086	0.00146667	0.000198		0	0	0			-42.3625	0.000153333	0.000624		-35.7143	0.00058	4.94e-05		0	0	0
-5.47532	0.000118333	0.000624		-6.60627	0.00058	4.94e-05		79.3769	0.00362075	0.0001544			-36.1408	0.000223333	8.4e-05		-28.125	0.000266667	0.000594		32.6531	0.00362075	0.0001544
-4.5493	0.000353333	8.4e-05		0	0	0		75.4735	0.00723683	0.00022			-22.5647	0.00042	4.84e-05		0	0	0		54.0816	0.00723683	0.00022
-2.77716	0.000153333	0.00062		0	0	0		81.5888	0.0144737	1.9e-05			-0.446429	0.000353333	4.94e-05		0	0	0		54.0816	0.0144737	1.9e-05
-0.741261	0.00042	0.000959		10.4502	0.000266667	0.000594		87.7403	0.0289473	5e-05			0	0	0		51.7857	0.000993333	0.0001544		93.8776	0.0289473	5e-05
0	0	0		37.5935	0.000993333	0.0001544							0	0	0		52.2321	0.00146667	0.000198
0	0	0		38.329	0.00138	0.00022							8.48214	0.000118333	0.000594		55.3571	0.00138	0.00022
8.81198	0.000426667	4.84e-05		40.1645	0.00328	1.9e-05							52.2909	0.000426667	0.000198		75.4464	0.00328	1.9e-05
0	0	0		0	0	0		0	0	0			0	0	0		0	0	0		0	0	0
0	0	0		0	0	0		24.5699	0.00362017	0.0008494			0	0	0		0	0	0		95.9184	0.00724733	0.0001984
15.4018	0.000516667	0.0001591		22.9107	0.00100633	0.000497		48.1712	0.00724733	0.0001984			23.7522	0.0003555	9.2e-05		54.0179	0.000993333	0.0008494		95.9184	0.0289427	2.42e-05
35.0514	0.000683333	0.00021894		27.9282	0.00206667	0.000489		58.5803	0.014469	0.000156			30.7801	0.000516667	0.0001591		68.75	0.00413333	0.000156		97.9592	0.00362017	0.0008494
43.2265	0.00128267	0.0001984		30.4532	0.000993333	0.0008494		58.5297	0.0289427	2.42e-05			39.2505	0.000683333	0.00021894		77.2321	0.00206667	0.0001984		97.9592	0.014469	0.000156
54.0094	0.0003555	9.2e-05		30.8022	0.0036	0.0007984							54.8402	0.00128267	0.0001984		89.2857	0.00100633	0.000497
63.339	0.000584667	0.0006198		34.3441	0.00206667	0.0001984							58.3595	0.000584667	0.0006198		90.1786	0.00206667	0.000489
65.8169	0.00171133	1.581e-05		34.9669	0.00413333	0.000156							91.6138	0.00171133	1.581e-05		90.1786	0.0036	0.0007984
Avg Removal %					Std. dev
Time	2BDD	BDD-SS	MMO		Time	2BDD	BDD-SS	MMO
0	0	0	0		0	0	0	0
30	-14.4439	-42.3625	23.7522		30	11.5791	6.85254	15.0093
60	-9.86479	-36.1408	58.3595		60	1.23815	10.6	2.53585
120	11.2114	-22.5647	91.6138		120	33.5598	30.9455	7.68363
Avg Removal %					Std. dev
Time	2BDD	BDD-SS	MMO		Time	2BDD	BDD-SS	MMO
0	0	0	0		0	0	0	0
30	15.7542	8.48214	30.7801		30	25.9144	48.2776	28.9554
60	15.766	-0.446429	39.2505		60	45.4484	96.6502	27.0828
120	43.8205	52.2909	54.8402		120	11.4668	36.7212	33.4283
Avg Removal %					Std. dev
Time	2BDD	BDD-SS	MMO		Time	2BDD	BDD-SS	MMO
0	0	0	0		0	0	0	0
30	-34.375	-28.125	89.2857		30	1.89404	3.15673	7.57614
60	-48.2143	-35.7143	90.1786		60	2.52538	1.26269	1.26269
120	52.6786	52.2321	90.1786		120	5.05076	0.631345	1.26269
Avg Removal %					Std. dev
Time	2BDD	BDD-SS	MMO		Time	2BDD	BDD-SS	MMO
0	0	0	0		0	0	0	0
30	50.4464	51.7857	54.0179		30	0.631345	1.26269	0.631345
60	60.2679	55.3571	77.2321		60	4.41942	3.78807	32.1986
120	57.5893	75.4464	68.75		120	4.41942	8.20749	1.26269
Avg Removal %					Std. dev
Time	2BDD	BDD-SS	MMO		Time	2BDD	BDD-SS	MMO
0	0	0	0		0	0	0	0
240	-23.4694	32.6531	97.9592		30	1.44308	14.4308	2.88615
	40.8163	54.0816	95.9184			2.88615	4.32923	0
	48.9796	54.0816	97.9592			0	7.21538	0
	97.9592	93.8776	95.9184			0	0	0
